# Supplementary material for: Insights into the Bacterial and Nitric Oxide-Induced Salt Tolerance in Sugarcane and Their Growth-Promoting Abilities
Source: MDPI journal article supplement (doi:10.3390/microorganisms9112203), 2021-10-22
Supplement: s1 [file s1]

**Supplementary Table S1.** qRT-PCR primer used in this study

| Gene name      | Primer     | Sequence (5'-3')           | References              |
|----------------|------------|----------------------------|-------------------------|
| <i>ScGAPDH</i> | GAPDH-F1   | CTCTGCCCCAAGCAAAGATG       | Singh et al. [2019] [1] |
| <i>SuDREB</i>  | GAPDH-R1   | TGTTGTGCAGCTAGCATTG        | Reis et al. [2014] [2]  |
|                | ScDREB2A-F | CAGTGTGCGCAACGGTTCAT       |                         |
| <i>SuCAT</i>   | ScDREB2A-R | GTAGCGGATCAAAAACCACTTTGT   | Chen et al. [2012] [3]  |
|                | SuCAT-F    | CTTGTCTGGAGCACATACACTTGGA  |                         |
| <i>SuSOD</i>   | SuCAT-R    | TTCTCCGCATAGACCTTGAACCTTTG | Jain et al. [2015] [4]  |
|                | SuSOD-F    | TTTGTCCAAGAGGGAGATGG       |                         |
|                | SuSOD-R    | CTTCTCCAGCGGTGACATT        |                         |

## References

1. Singh, P.; Song, Q.Q.; Singh, R.K.; Li, H.B.; Solanki, M.K.; Malviya, M.K.; Verma, K.K.; Yang, L.T.; Li, Y.R. Proteomic analysis of the resistance mechanisms in sugarcane during *Sporisorium scitamineum* infection. *Int. J. Mol. Sci.* **2019**, *20*(3), .569.
2. Reis, R.R.; da Cunha, B.A.D.B.; Martins, P.K.; Martins, M.T.B.; Alekcevetch, J.C.; Chalfun-Júnior, A.; Andrade, A.C.; Ribeiro, A.P.; Qin, F.; Mizoi, J.; Yamaguchi-Shinozaki, K. Induced over-expression of AtDREB2A CA improves drought tolerance in sugarcane. *Plant Sci.* **2014**, *221*, 59-68.
3. Chen, S.S. Cloning and Expression Analysis of ROS Metabolism Pathway Key Genes from Sugarcane. Master's Thesis, Fujian Agriculture and Forestry University, Fuzhou, China, **2012**.
4. Jain, R.; Chandra, A.; Venugopalan, V.K.; Solomon, S. Physiological Changes and Expression of SOD and P5CS Genes in Response to Water Deficit in Sugarcane. *Sugar Tech.* **2015**, *17*, 276–282.

**Supplementary Table S2. Morphological and biochemical characteristics of the isolate ASN-1**

| <b>Tests</b>                | <b>Isolate ASN-1</b> |
|-----------------------------|----------------------|
| Gram reaction               | +                    |
| Shape                       | Rod                  |
| Motility                    | +                    |
| Endospore                   | -                    |
| NaCl tolerance (%)          | 15                   |
| pH tolerance                | 10                   |
| Temperature tolerance       | 50                   |
| Catalase                    | +                    |
| Oxidase                     | +                    |
| Citrate utilization         | +                    |
| Methyl red                  | +                    |
| Indole                      | +                    |
| Phenylalanine deamination   | +                    |
| Nitrate Reduction           | +                    |
| Lysine utilization          | +                    |
| Voges Proskauer's           | -                    |
| Ornithine utilization       | -                    |
| H <sub>2</sub> S production | -                    |

‘+’ positive for test; ‘-’ negative for test

**Supplementary Table S3:** Number of substrates utilized by the strain ASN-1.

| Chemical Guild                           | Total number of Substrates | Strain ASN-1 |
|------------------------------------------|----------------------------|--------------|
| Sugars                                   | 27                         | 15           |
| Chemical sensitivity                     | 23                         | 13           |
| Acidic pH                                | 2                          | 02           |
| Sodium Chloride                          | 3                          | 03           |
| Lactic acid                              | 1                          | 00           |
| Hexose-PO <sub>4</sub>                   | 2                          | 02           |
| Amino acid                               | 9                          | 09           |
| Hexose acid                              | 9                          | 07           |
| Reducing Sugar                           | 2                          | 02           |
| Carboxylic acids, esters and fatty acids | 18                         | 07           |

**Supplementary Table S4:** Substrate present in each well of Biolog Micro-Plate

| Biolog well Serial No. | Carbon sources (GNIII)          |
|------------------------|---------------------------------|
| A1                     | Negative Control                |
| A2                     | Dextrin                         |
| A3                     | D-Maltose                       |
| A4                     | D-Trehalose                     |
| A5                     | D-Cellobiose                    |
| A6                     | Gentiobiose                     |
| A7                     | Sucrose                         |
| A8                     | D-Turanose                      |
| A9                     | Stachyose                       |
| A10                    | Positive Control                |
| A11                    | pH 6                            |
| A12                    | pH 5                            |
| B1                     | D-Raffinose                     |
| B2                     | $\alpha$ -D-Lactose             |
| B3                     | D-Melibiose                     |
| B4                     | $\beta$ -Methyl-D-Glucoside     |
| B5                     | D-Salicin                       |
| B6                     | N-Acetyl-D-Glucosamine          |
| B7                     | N-Acetyl- $\beta$ -DMannosamine |
| B8                     | N-Acetyl-D-Galactosamine        |
| B9                     | N-AcetylNeuraminic Acid         |
| B10                    | 1% NaCl                         |
| B11                    | 4% NaCl                         |
| B12                    | 8% NaCl                         |
| C1                     | $\alpha$ -D-Glucose             |
| C2                     | D-Mannose                       |
| C3                     | D-Fructose                      |
| C4                     | D-Galactose                     |
| C5                     | 3-Methyl Glucose                |
| C6                     | D-Fucose                        |
| C7                     | L-Fucose                        |
| C8                     | L-Rhamnose                      |
| C9                     | Inosine                         |
| C10                    | 1% Sodium Lactate               |
| C11                    | Fusidic Acid                    |
| C12                    | D-Serine                        |
| D1                     | D-Sorbitol                      |
| D2                     | D-Mannitol                      |
| D3                     | D-Arabitol                      |
| D4                     | myo-Inositol                    |
| D5                     | Glycerol                        |
| D6                     | D-Glucose-6-PO <sub>4</sub>     |
| D7                     | D-Fructose-6-PO <sub>4</sub>    |
| D8                     | D-Aspartic Acid                 |
| D9                     | D-Serine                        |
| D10                    | Troleandomycin                  |
| D11                    | Rifamycin SV                    |
| D12                    | Minocycline                     |
| E1                     | Gelatin                         |
| E2                     | Glycyl-L-Proline                |

---

|     |                                   |
|-----|-----------------------------------|
| E3  | L-Alanine                         |
| E4  | L-Arginine                        |
| E5  | L-Aspartic Acid                   |
| E6  | L-Glutamic Acid                   |
| E7  | L-Histidine                       |
| E8  | L-Pyroglutamic Acid               |
| E9  | L-Serine                          |
| E10 | Lincomycin                        |
| E11 | Guanidine HCl                     |
| E12 | Niaproof 4                        |
| F1  | Pectin                            |
| F2  | D-Galacturonic Acid               |
| F3  | L-Galactonic Acid Lactone         |
| F4  | D-Gluconic Acid                   |
| F5  | D-Glucuronic Acid                 |
| F6  | Glucuronamide                     |
| F7  | Mucic Acid                        |
| F8  | Quinic Acid                       |
| F9  | D-Saccharic Acid                  |
| F10 | Vancomycin                        |
| F11 | Tetrazolium Violet                |
| F12 | Tetrazolium Blue                  |
| G1  | p-Hydroxy- Phenylacetic Acid      |
| G2  | Methyl Pyruvate                   |
| G3  | D-Lactic Acid Methyl Ester        |
| G4  | L-Lactic Acid                     |
| G5  | Citric Acid                       |
| G6  | $\alpha$ -Keto-Glutaric Acid      |
| G7  | D-Malic Acid                      |
| G8  | L-Malic Acid                      |
| G9  | Bromo-Succinic Acid               |
| G10 | Nalidixic Acid                    |
| G11 | Lithium Chloride                  |
| G12 | Potassium Tellurite               |
| H1  | Tween 40                          |
| H2  | $\gamma$ -Amino-Butyric Acid      |
| H3  | $\alpha$ -Hydroxy- Butyric Acid   |
| H4  | $\beta$ -Hydroxy-D,L Butyric Acid |
| H5  | $\alpha$ -Keto-Butyric Acid       |
| H6  | Acetoacetic Acid                  |
| H7  | Propionic Acid                    |
| H8  | Acetic Acid                       |
| H9  | Formic Acid                       |
| H10 | Aztreonam                         |
| H11 | Sodium Butyrate                   |
| H12 | Sodium Bromate                    |

---
